# Supplementary material for: Iterative Most-Likely Point Registration (IMLP): A Robust Algorithm for Computing Optimal Shape Alignment
Source: PubMed Central journal article supplement (PMC4352012; doi:10.1371/journal.pone.0117688), 2015-03-06
Supplement: pone.0117688.s002.pdf [file pone.0117688.s002.pdf]

## S2 Appendix: Equivalent Forms for the Generalized Total-Least-Squares (GTLS) Problem of Aligning Corresponding Point Sets

In this appendix, we establish the equivalence between two different representations for the generalized total-least-squares (GTLS) problem of registering two corresponding point sets under a generalized noise model. Our aim is to show that the unconstrained optimization

$$E_{\text{GTLS}}(X, Y, M_X, M_Y) = \min_{R, \vec{t}} \sum_{i=1}^n (\vec{y}_i - R\vec{x}_i - \vec{t})^T (RM_{x_i}R^T + M_{y_i})^{-1} (\vec{y}_i - R\vec{x}_i - \vec{t}) \quad (1)$$

is equivalent to the constrained optimization

$$E_{\text{GTLS}}(X, Y, M_X, M_Y) = \min_{R, \vec{t}} \sum_{i=1}^n (\vec{x}_i - \vec{x}_i^*)^T M_{x_i}^{-1} (\vec{x}_i - \vec{x}_i^*) + \sum_{i=1}^n (\vec{y}_i - \vec{y}_i^*)^T M_{y_i}^{-1} (\vec{y}_i - \vec{y}_i^*) \quad (2)$$

subject to:  $\vec{y}_i^* = R\vec{x}_i^* - \vec{t}$

where  $X = \{\vec{x}_i\}$  and  $Y = \{\vec{y}_i\}$  are the measured source and target point sets and  $M_X = \{M_{x_i}\}$  and  $M_Y = \{M_{y_i}\}$  are the noise covariances of the measured points. The point sets  $\{\vec{x}_i^*\}$  and  $\{\vec{y}_i^*\}$  represent the optimizer's estimates for the unknown, noise-free positions of the source and target points which, due to the correspondence assumption, are constrained to have perfect alignment under the transformation parameters,  $R$  and  $\vec{t}$ , that are being solved by the optimization.

To establish an equivalence between (1) and (2), we begin at (2) by deriving expressions for the estimates of the noise-free point sets  $\{\vec{x}_i^*\}$  and  $\{\vec{y}_i^*\}$  in terms of the measured points, noise covariances, and transformation parameters. These expressions will then be substituted into the cost function of (2) which, through a subsequent series of algebraic simplifications, will be shown to be equivalent to the form of (1).

To begin, we solve for expressions of the noise-free estimates  $\{\vec{x}_i^*\}$  and  $\{\vec{y}_i^*\}$ . This may be accomplished using the method of Lagrange multipliers. Redefining the constraints as

$$F_i(\vec{x}_i^*, \vec{y}_i^*, R, \vec{t}) = \vec{y}_i^* - R\vec{x}_i^* - \vec{t} = 0 \quad (3)$$

we obtain the following Lagrangian function

$$\mathcal{L} = \sum_{i=1}^n (\vec{x}_i - \vec{x}_i^*)^T M_{x_i}^{-1} (\vec{x}_i - \vec{x}_i^*) + \sum_{i=1}^n (\vec{y}_i - \vec{y}_i^*)^T M_{y_i}^{-1} (\vec{y}_i - \vec{y}_i^*) + \lambda_i^T F_i(\vec{x}_i^*, \vec{y}_i^*, R, \vec{t}) \quad (4)$$

which may be expressed in matrix form as

$$\mathcal{L} = (X - X^*)^T M_X^{-1} (X - X^*) + (Y - Y^*)^T M_Y^{-1} (Y - Y^*) + \lambda^T F \quad (5)$$

where we have defined

$$X = \begin{bmatrix} \vec{x}_1 \\ \vdots \\ \vec{x}_n \end{bmatrix}, \quad X^* = \begin{bmatrix} \vec{x}_1^* \\ \vdots \\ \vec{x}_n^* \end{bmatrix}, \quad Y = \begin{bmatrix} \vec{y}_1 \\ \vdots \\ \vec{y}_n \end{bmatrix}, \quad Y^* = \begin{bmatrix} \vec{y}_1^* \\ \vdots \\ \vec{y}_n^* \end{bmatrix},$$

$$M_X = \begin{bmatrix} M_{x1} & & \\ & \ddots & \\ & & M_{xn} \end{bmatrix}, \quad M_Y = \begin{bmatrix} M_{y1} & & \\ & \ddots & \\ & & M_{yn} \end{bmatrix}, \quad \lambda = \begin{bmatrix} \lambda_1 \\ \vdots \\ \lambda_n \end{bmatrix}, \quad F = \begin{bmatrix} F_i(\vec{x}_1^*, \vec{y}_1^*, R, \vec{t}) \\ \vdots \\ F_i(\vec{x}_n^*, \vec{y}_n^*, R, \vec{t}) \end{bmatrix}.$$

The next step is to minimize the Lagrangian function with respect to the estimates of the noise-free point sets. This is done by solving for the partial derivatives of the Lagrangian function with respect to each estimate

$$\frac{\partial \mathcal{L}}{\partial X^*} = -2M_X^{-1}(X - X^*) - \text{diag}(R^T)\lambda \quad (6)$$

$$\frac{\partial \mathcal{L}}{\partial Y^*} = -2M_Y^{-1}(Y - Y^*) + \lambda \quad (7)$$

and setting the partial derivatives to zero which leads to the following equations

$$(X - X^*) = -\frac{1}{2}M_X \text{diag}(R^T)\lambda \quad (8)$$

$$(Y - Y^*) = \frac{1}{2}M_Y\lambda. \quad (9)$$

We now have all the equations required to solve for expressions of  $\vec{x}_i^*$  and  $\vec{y}_i^*$  in terms of the other parameters. Solving (9) for  $\lambda_i$

$$\lambda_i = 2M_{y_i}^{-1} (\vec{y}_i - \vec{y}_i^*) \quad (10)$$

and substituting into the relevant sub-component of (8) we obtain

$$(\vec{x}_i - \vec{x}_i^*) = -M_{x_i} R^T M_{y_i}^{-1} (\vec{y}_i - \vec{y}_i^*) . \quad (11)$$

Substituting the constraint from (2) into (11) we have

$$(\vec{x}_i - \vec{x}_i^*) = -M_{x_i} R^T M_{y_i}^{-1} (\vec{y}_i - R\vec{x}_i^* - t) . \quad (12)$$

Rearrangement of (12) produces the following expression for  $\vec{x}_i^*$

$$\vec{x}_i^* = (I + M_{x_i} R^T M_{y_i}^{-1} R)^{-1} (\vec{x}_i + M_{x_i} R^T M_{y_i}^{-1} (\vec{y}_i - t)) \quad (13)$$

$$= \vec{x}_i + M_{x_i} R^T (M_{y_i} + R M_{x_i} R^T)^{-1} (\vec{y}_i - R\vec{x}_i - t) . \quad (14)$$

The derivation of (14) from (13) is accomplished by expanding the multiplication with the inverse expression and applying the following helpful identities

$$(I + AB)^{-1} = I - A(BA + I)^{-1}B \quad (15)$$

$$(A + B)^{-1}C = (C^{-1}A + C^{-1}B)^{-1} \quad (16)$$

$$C(A + B)^{-1} = (AC^{-1} + BC^{-1})^{-1} . \quad (17)$$

The identity of (15) follows as a simplification of

$$(A + BCD)^{-1} = A^{-1} - A^{-1}B(DA^{-1}B + C^{-1})^{-1}DA^{-1} , \quad (18)$$

which is described in [1], while those of (16) and (17) are easily verified.

An expression for  $\vec{y}_i$  is obtained in similar manner by solving (8) for  $\lambda_i$  and substituting into (9) along

with the constraint of (2), which leads to the equations

$$\vec{y}_i^* = (I + M_{y_i} R M_{x_i}^{-1} R^T)^{-1} (\vec{y}_i + M_{y_i} R M_{x_i}^{-1} (\vec{x}_i + R^T t)) \quad (19)$$

$$= \vec{y}_i - M_{y_i} (R M_{x_i} R^T + M_{y_i})^{-1} (\vec{y}_i - R \vec{x}_i - t) . \quad (20)$$

The next step is to substitute the expressions of  $\vec{x}_i$  from (14) and of  $\vec{y}_i$  from (20) into the cost function of (2). To simplify the resulting equations, we make the following definitions

$$M_i = (R M_{x_i} R^T + M_{y_i})$$

$$\vec{d}_i = \vec{y}_i - R \vec{x}_i - \vec{t} .$$

Applying these substitutions, the two terms within the cost function of (2) become

$$(\vec{x}_i - \vec{x}_i^*)^T M_{x_i}^{-1} (\vec{x}_i - \vec{x}_i^*) = \vec{d}_i^T M_i^{-1} R M_{x_i} R^T M_i^{-1} \vec{d}_i \quad (21)$$

$$(\vec{y}_i - \vec{y}_i^*)^T M_{y_i}^{-1} (\vec{y}_i - \vec{y}_i^*) = \vec{d}_i^T M_i^{-1} M_{y_i} M_i^{-1} \vec{d}_i . \quad (22)$$

Substituting these equations into the cost function of (2), we have

$$\begin{aligned} E_{\text{GTLS}}(X, Y, M_X, M_Y) &= \min_{R, \vec{t}} \sum_{i=1}^n [(\vec{x}_i - \vec{x}_i^*)^T M_{x_i}^{-1} (\vec{x}_i - \vec{x}_i^*) + (\vec{y}_i - \vec{y}_i^*)^T M_{y_i}^{-1} (\vec{y}_i - \vec{y}_i^*)] \\ &\quad \text{subject to: } \vec{y}_i^* = R \vec{x}_i^* - \vec{t} \\ &= \min_{R, \vec{t}} \sum_{i=1}^n \left[ \vec{d}_i^T M_i^{-1} R M_{x_i} R^T M_i^{-1} \vec{d}_i + \vec{d}_i^T M_i^{-1} M_{y_i} M_i^{-1} \vec{d}_i \right] \\ &= \min_{R, \vec{t}} \sum_{i=1}^n \vec{d}_i^T (M_i^{-1} R M_{x_i} R^T M_i^{-1} + M_i^{-1} M_{y_i} M_i^{-1}) \vec{d}_i \\ &= \min_{R, \vec{t}} \sum_{i=1}^n \vec{d}_i^T (M_i^{-1} (R M_{x_i} R^T + M_{y_i}) M_i^{-1}) \vec{d}_i \\ &= \min_{R, \vec{t}} \sum_{i=1}^n \vec{d}_i^T (M_i^{-1} M_i M_i^{-1}) \vec{d}_i \\ &= \min_{R, \vec{t}} \sum_{i=1}^n \vec{d}_i^T M_i^{-1} \vec{d}_i \\ &= \min_{R, \vec{t}} \sum_{i=1}^n (\vec{y}_i - R \vec{x}_i - \vec{t})^T (R M_{x_i} R^T + M_{y_i})^{-1} (\vec{y}_i - R \vec{x}_i - \vec{t}) \end{aligned} \quad (23)$$

where the final form of (23) is equivalent to (1), which completes the derivation of equivalence between (1) and (2) that we aimed to show.

## References

1. Kailath T (1980) Linear systems. Prentice-Hall Englewood Cliffs, NJ.
